# Supplementary material for: Assessing the effects of β-triketone herbicides on HPPD from environmental bacteria using a combination of in silico and microbiological approaches
Source: Springer Nature journal article supplement (doi:10.1007/s11356-022-22801-7), 2022-09-06
Supplement: MOESM1 [file 11356_2022_22801_MOESM1_ESM%20%281%29.pdf]

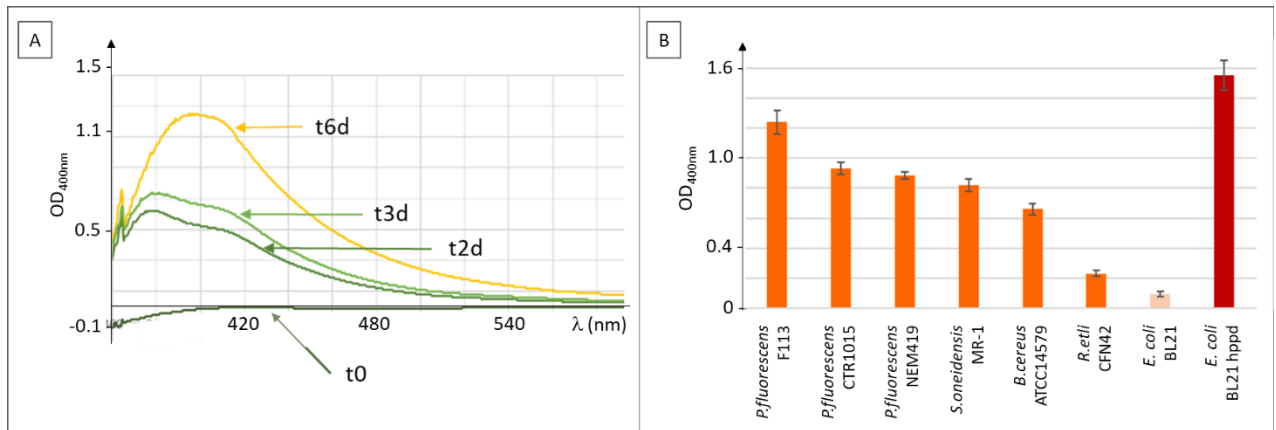

**Supplementary Figure 1. Analysis of the pyomelanin production capacity of the studied bacterial strains.** A) Absorption spectra of cell-free supernatant from the strain *P. fluorescens* NEM419, obtained by centrifugation from 0, 2, 3 and 6 days of culture. Absorption spectra were recorded in the range of 300–600 nm in a UV–Vis spectrophotometer using sterile culture medium as blank. B) Optical density recorded at 400 nm of cell-free supernatant of the six bacterial strains of the study, obtained after 6 to 10 days of culture. *E. coli* BL21 and *E. coli* BL21 hppd were used as negative and positive control respectively. Error bars are calculated from the standard deviation for each series.

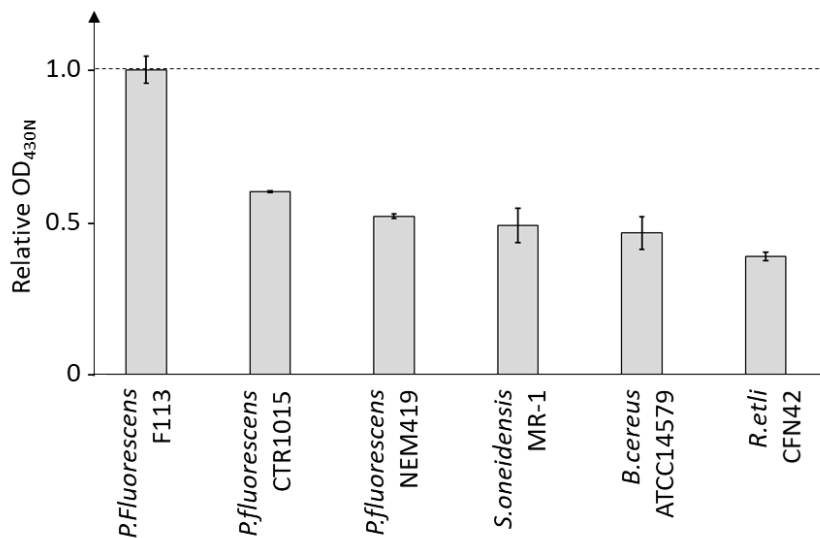

**Supplementary Figure 2. Comparison of OD<sub>430N</sub> of five bacterial strains (*P. fluorescens* CTR1015 and NEM419, *S. oneidensis* MR-1, *B. cereus* ATCC14579 and *R. etli* CFN42) with the one of *P. fluorescens* F113.** Each value is obtained by subtracting the mean OD<sub>430nm</sub> obtained in positive controls (i.e. OD<sub>430PC</sub>) from the mean OD<sub>430</sub> obtained in negative controls (i.e. OD<sub>430NC</sub>). The obtained difference is compared to the one of *P. fluorescens* F113 which has an arbitrary value of 1

and is depicted on this figure as “relative OD<sub>430N</sub>”. Error bars are calculated from the standard deviation for each series.

B.cereus MKQKSMIDLAAQMEDFFPVRDVDHLE---FVVGNAKQS--SYLLARAFGFKIVAYSGLT 55  
S.oneidensis -----MASELNP-LGLLGIEFTEFASSDTDF---MHKVFI DFGFSLK----- 39  
R.etli MGPFPHDAPSEITADNP-AGTDGFEFVEFAHPEPEK---LSELFTRMGYVA----- 50  
P.kilonensis -----MADLYENP-MGLMGFEFIEFASPTPNT---LEPIFEIMGFTKVA----- 40  
L.pneumophila -----MQNNNP-CGLDGF AFLE FSGPDRNK---LHQQFSEMGFQAVA----- 38  
P.aeruginosa -----MNAVAKIEQHNP-IGTDGFEFVEFTAPDAKGI EQLRQLFNMMGFTE TA----- 47  
A.salmonicida ---MTTSSSSRSH TINP-LGSDGFEFVEYTAAPDAKGI AALKALFVSLGFAEVA----- 50  
V.parahaemolyticus -----MVDTYNP-LGTDGFEFVEYTAADSKGI EQLKALFISLGF AE IA----- 42  
V.anguillarum -----MTSTFNP-LGTDGFEFVEYTAADPAGIAQLKELFTSLGFAEIA----- 42

\* . : : : : \*

B.cereus GNREKVS YVLVQKNMRFVVS GALSS ENRIAE FVKTHGDGVKDVALLVDDVDKAYSEAVKR 115  
S.oneidensis KAKNKDILYKQNDINFLLNKQ--REGFS AKFAKSHGPAICSMGWRVEDASFHRVAVER 97  
R.etli RHKTKDITTIWRQGDINIVLNAE--PGSHAARFVAKHGFCAPSMAWRVVDARHAFNHAVSK 108  
P.kilonensis THR SKNVHL YRQGA INLILNNE--PHSVASYFAAEHGP SVCGMAFRVKDSQQAYKRALEL 98  
L.pneumophila HHKNQDITL FKQGEIQFIVNAA--SHCQAEAHASTHGFGACAMGFKVKDAKAAFQHAI AH 96  
P.aeruginosa KHR SKEVFL FQNDINI VLNGS--PTGHVHEFALKHGFSACAMAFRVKNASQAAAYAESQ 105  
A.salmonicida KHKHKQCWL YRQGDIN FV VNAE--PHSQAEQFASLHGFSVCGMAFRVADAGKAQFYAITK 108  
V.parahaemolyticus KHR SKEAWL YRQGDISFIVNAI--PHSQAEFAKVHGP SVCGMAFRVHDATVALEHAIQN 100  
V.anguillarum KHR SKEAWL YRQGDIN FIVNSQ--PHSQAAAFKVHGP SVCGMAFRVHDASVAMQHVQAN 100

: : \* : : : . . \*\* : . \* : \* .

B.cereus GAVAIAPPQELTDEDGLKKA VIGTYGDIHTLVERKNYKGA F-MPGFQKV-----EFNI 169  
S.oneidensis GAKAADD-----AKDLPYPAIYIGDLSLIYFIDT FGANNNIYATDFEDLSEPV----- 146  
R.etli GAVPYEGN-----DKVLDVPAIVGIGSSLLYFVETYGAKGSAYEAEFDWLGEPN----P 158  
P.kilonensis GAQPIHIETG--PMELNLPAIKGIGGAPLYLIDRFEGESSIYDIDFVVFLEGVD----R 150  
L.pneumophila GGIAFQDA-P---HANHGLPAIQIGGSIYFVDEEHQ-----PFSHEWNITSP E 142  
P.aeruginosa GAKLVGSHAN---FGE LNI P SLEIGGSSLLYLVDRYGD-RS IYDVFDFEIGRS-----A 156  
A.salmonicida GAKPFVGKIG---LME LNI PAI YGIGESTLSFVDRYGDKGS IYDVFDFVFPDWQTR--M 162  
V.parahaemolyticus GGTEYKTEIG---PMELSPAIYIGIGESLLYFVDRY GK-QS IYDVFDFRYDDADDR--L 153  
V.anguillarum GGREYKTIQIG---PMELSPAIYIGIGDLSLLYFVDRYGS-QS IYDVFDFKYADANQR--M 153

\* . : : \* : : :

B.cereus PFEESGLI A V D H V M N V E--KMEEWVS YENVMGFKQMIHFD DDDI STEYSALMSKVMTN 227  
S.oneidensis ITQEKGFIEVDHLINNVYKGTMEHWANFYKNI FGFTEVRYFD---ISGVOTALVSYALRS 203  
R.etli KPLGIGFYLLDHLTHNVFRGNM DKWDFYRNLNFNKQIHF FD---IDGRI TGLVSR AITS 215  
P.kilonensis NPFVAGLKI IDHLTHNVYRGRMAYWAGFYEKLFNFREIRYFD---IKGEYTGITSKAMTA 207  
L.pneumophila PVVGNGLTAIDHLTHNVYRGNM DKWASFYASIFNFQEI RFFN---IKGKMTGLVSRALGS 199  
P.aeruginosa NDNSVGLTYIDHLTHNVKRGQMDVWSGFYERIANFREIRYFD---IEGKLTGLVSRAMTA 213  
A.salmonicida AEVDAGLYEIDHLTHNVQRGNM D VWSNFYERIGNFREIRYFD---IEGKLTGLVSRAMTA 219  
V.parahaemolyticus AKSDVGLYEIDHLTHNVKQGNM D VWSGFYERIGNFREIRYFD---IEGKLTGLVSRAMTA 210  
V.anguillarum TDANVGLFEIDHLTHNVKQGNM D IWSGFYERIGNFREIRYFD---IEGKLTGLVSRAMTA 210

\* : : \* : \* \* \* \* : \* : \* : \* . : \* \* \* :

B.cereus -GSRIKFPINEPADGKRKSIQI EYLFYNGAGVCHLALLTSDIVKTVEALRANGVEFLDT 286  
S.oneidensis PDGSFCIPINEGK-GNDKNQID EYLKE YNGPGVCHLAFRSRDIVKSLDAMEGSSIQCLDI 262  
R.etli PCGKIRIPINES--KDDTSQIEEYFLKKYRGEIGCHLAVGTEDIYEATDRLADNGLRMPG 273  
P.kilonensis PDGMIRIPINES--SKGAGSQIEEFLMKNQIEEYVAFLLD L IKTWHLKIGMRMTA 266  
L.pneumophila PCGKIRIPINES--KDDL SQIEEFLHEYHGEIGCHLALNTNDIYKTVNGLRQGVKFLDV 257  
P.aeruginosa PCGKIRIPINES--ADDSQIEE F IREYHGEIGCHLALTTDDIYATVRKLRDNGVKFMST 271  
A.salmonicida PCGKIRIPINES--SDDKSQIEEYLRQYKGEIGCHLALASSDIYQTIRTLRGRGTGMFPT 277  
V.parahaemolyticus PCGKIRIPINES--SDDKSQIEE F IREYNGEIGCHLALTTDDIYQTVQLTRDRGMFPT 268  
V.anguillarum PCGKIRIPINES--SDDKSQIEE F IREYNGEIGCHLALSTDDIYQTVRTLREGRGMFPT 268

. : : \* : \* . : \* \* : : \* \* : \* : \* : \* : \* : \*

B.cereus -PDTYYDEL TARVGI DEE IDKLKELKIVDRD-----DEGYLLQIFTKPIVDRPTLEI 339  
S.oneidensis -IPEYYDTIFDKVPQVTENDRIKKHQIVDGD-----ESGYLLQIFTKNLFG--PIEF 313  
R.etli PPETYDMSYERVGHGDEPIDRMKKGILIDGEGVNVGMTKILLQIFSKTVIG--PIEF 331  
P.kilonensis PPDTYYEMLEGRLPNHGEPVDELQSRGILLDGAS--EQGDKRLLQLIFSETLMG--PVFF 322  
L.pneumophila -PDTYYEMINDRLPWHKPELNLQHLAEKILIDGEA--DP-KDGLLLQIFYENIFG--PVFF 311  
P.aeruginosa -PDTYYEKVDTRVAGHDEPLERLRELNLIDGAE--PG-DDGILLQIFSDTVIG--PIEF 324  
A.salmonicida -PDTYYEKVNSRVEGHQEDLASLKDQLIDIGS--PT-KDGILLQIFSDTVIG--PVFF 330  
V.parahaemolyticus -PDTYYEKVDERVEGHTEDVSKLRDLQILIDGAE--PT-KDGILLQIFSDTVIG--PVFF 321  
V.anguillarum -PDTYYEKVSDRVEGHQEDVDQLKALRLIDGAE--PM-KDGILLQIFSDTVIG--PVFF 321

\* \* : : : \* : : : \* \* \* \* : : : \*

B.cereus EIIQRKGSRGFEGNFKALFESIEREQERRGNL----- 372  
S.oneidensis EIIQRKNNLGFEGNFKALFQSIERDQMRGVL----- 346  
R.etli EFIQRKGDEGFEGNFKALFESIEADQIKRGGVIGTAAE-- 369  
P.kilonensis EFIQRKGGDGFEGNFKALFESIERDQVRRGVLATE---- 358  
L.pneumophila EIIQRKGNQGFEGNFKALFEAIERDQVRRGTLKELS--- 348  
P.aeruginosa EIIQRKGNQGFEGNFKALFESIEEDQIRRGVI----- 357  
A.salmonicida EIIQRKGNEGFEGNFKALFESIEELDQIRRGVHLHGEPDA 370  
V.parahaemolyticus EIIQRKGNEGFEGNFKALFESIEEDQIRRGVLSDA---- 357  
V.anguillarum EIIQRKGNEGFEGNFKALFESIEEDQIRRGVLSDA---- 357

\* \* \* \* . \* \* \* \* \* \* \* \* \* \* \* \* \* \* :

**Supplementary Figure 3. HPPD protein alignments.** *B. cereus* ATCC14579, *S. oneidensis* MR-1, *R. etli* CFN42, *P. fluorescens* F113, *L. pneumophila*, *P. aeruginosa*, *A. salmonicida*, *V. parahaemolyticus* and *V. anguillarum* and protein sequences were retrieved from Genbank (<https://www.ncbi.nlm.nih.gov/genbank/>) and aligned with ClustalW [37]. The amino acids corresponding to the active site of the enzyme are framed in pink. Those involved in the substrate-binding domain are framed in green. Highly conserved amino-acids are framed in violet. “\*” indicates perfect alignment. “:” indicates a site belonging to group exhibiting strong similarity. “.” indicates a site belonging to a group exhibiting weak similarity.

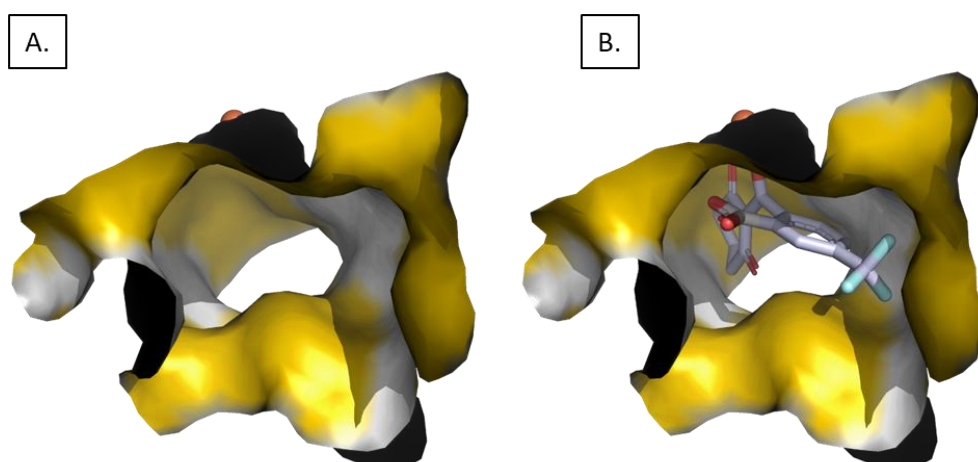

**Supplementary Figure 4. Lipophilic properties of the substrate HPP binding domain (yellow) of HPPD from *Streptomyces avermitilis*.** A) Open substrate binding domain and B) binding domain occupied by NTBC, an HPPD inhibitor. Lipophilic domain was coloured using the YRB script [72].

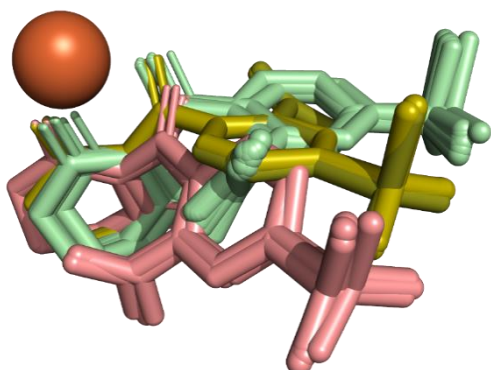

**Supplementary Figure 5. Example of docking results obtained with mesotrione coordinated on the metal dication on homology model of *P. fluorescens* F113.** In green, the 18 poses in an

orientation most similar to that observed with inhibitors co-crystalized with HPPD; In gold, the 3 poses in the less favourable orientation; In pink, the 4 in the least desirable orientation.

**Supplementary Table 6. Binding energies and number of poses in optimal orientations for sulcotrione, mesotrione and tembotrione in the homology models.**

|                            | Sulcotrione               |         | Mesotrione                |         | Tembotrione               |         |
|----------------------------|---------------------------|---------|---------------------------|---------|---------------------------|---------|
|                            | Binding energy (kcal/mol) | Poses # | Binding energy (kcal/mol) | Poses # | Binding energy (kcal/mol) | Poses # |
| <i>P. fluorescens</i> F113 | -2.2±0.2                  | 20      | -1.4±0.2                  | 20      | -2.5±0.2                  | 23      |
| <i>S. oneidensis</i> MR-1  | -3.3±0.1                  | 24      | -2.5±0.2                  | 25      | -3.3±0.2                  | 13      |
| <i>B. cereus</i> ATCC14579 | -3.0±0.2                  | 23      | -2.4±0.2                  | 25      | -3.2±0.1                  | 15      |
